# Supplementary material for: An adaptive bin framework search method for a beta-sheet protein homopolymer model
Source: PubMed Central journal article supplement (PMC1894818; doi:10.1186/1471-2105-8-136), 2007-04-24
Supplement: 1471-2105-8-136-S1.pdf [file 1471-2105-8-136-S1.pdf]

# Additional file 1: Additional data for an adaptive bin framework search method for a beta-sheet protein homopolymer model

---

## Abstract

In this supplementary file, we show additional low-energy conformations for the 64 amino acid homopolymer found by BINMC, provide details on experiments conducted to determine good parameter settings for BINMC and supply the necessary information to reconstruct the lowest energy conformations of homopolymers of length 12, 24, 32, and 64 found by our new algorithm.

---

## 1 Low-energy conformations for the 64 amino acid homopolymer

Figures 1 and 2 show low energy conformations with energies  $-387$  and  $-389$  for the 64 amino acid homopolymer. As mentioned in our paper, the lowest energy found for this homopolymer was  $-391$ .

## 2 Parameter settings for BINMC

In this section we describe details of our study of the parameters of the BINMC algorithm. In order to determine reasonable values for all parameters and study the impact of parameter settings on BINMC's performance, we performed 20 independent runs for various parameter settings on the polymer of length 32, and in each of these we measured the CPU time required to reach the lowest known energy level of  $-161$ . To study the influence of different parameters, we varied one parameter (or, for closely related parameters, sometimes two parameters) at a time, while all other parameters were kept constant. Unless indicated otherwise, parameters for the homopolymer of length 32 were fixed at the following values:  $\Delta E = 20$ ,  $\Delta E_i = 5$ ,  $T_{MC} = 1.25$ ,  $T_{bin} = 4.344$ ,  $binCapacity = 100$ ,  $HD_{MAX} = 0.6$ ,  $HD_{MIN} = 0.1$ ,  $noImprRetrieve = 100\,000$  steps. These particular parameter settings have been determined in preliminary, informal experiments (not reported here). For each parameter setting, we conducted 20 independent runs of BINMC on

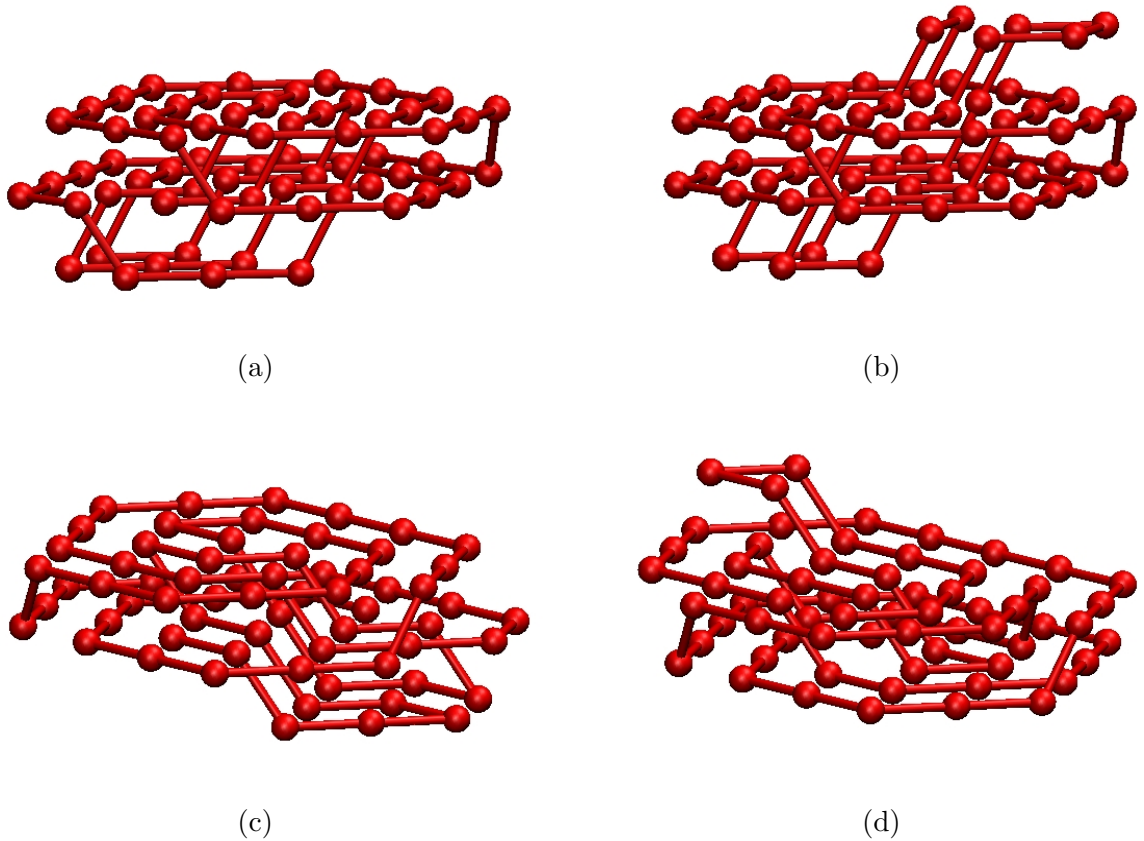

Fig. 1. Part (a) a low-energy conformation of the FCC 64 amino acid homopolymer found by BINMC (energy  $-387$ , short-range energy is  $-208$ , long-range energy is  $-179$ ); part (b) another low-energy conformation of the FCC 64 amino acid homopolymer found in the same run of BINMC (energy  $-389$ , short-range energy is  $-212$ , long-range energy is  $-177$ ). Part (c) a low-energy conformation of the FCC 64 amino acid homopolymer found by BINMC (energy  $-387$ , short-range energy is  $-208$ , long-range energy is  $-179$ ); part (d) another low-energy conformation of the FCC 64 amino acid homopolymer found in the same run of BINMC (energy  $-389$ , short-range energy is  $-220$ , long-range energy is  $-169$ ).

our 2.4 GHz reference machine and measured the average as well as the standard deviation of the CPU time required for reaching a conformation with energy  $-161$ .

### 2.1 The *noImprRetrieve* Parameter

The *noImprRetrieve* parameter controls the stringency of the stagnation criterion and hence the frequency of retrieving conformations from the bin system. To investigate the impact of this parameter on the performance of the BINMC algorithm, we conducted 20 independent runs for the homopolymer

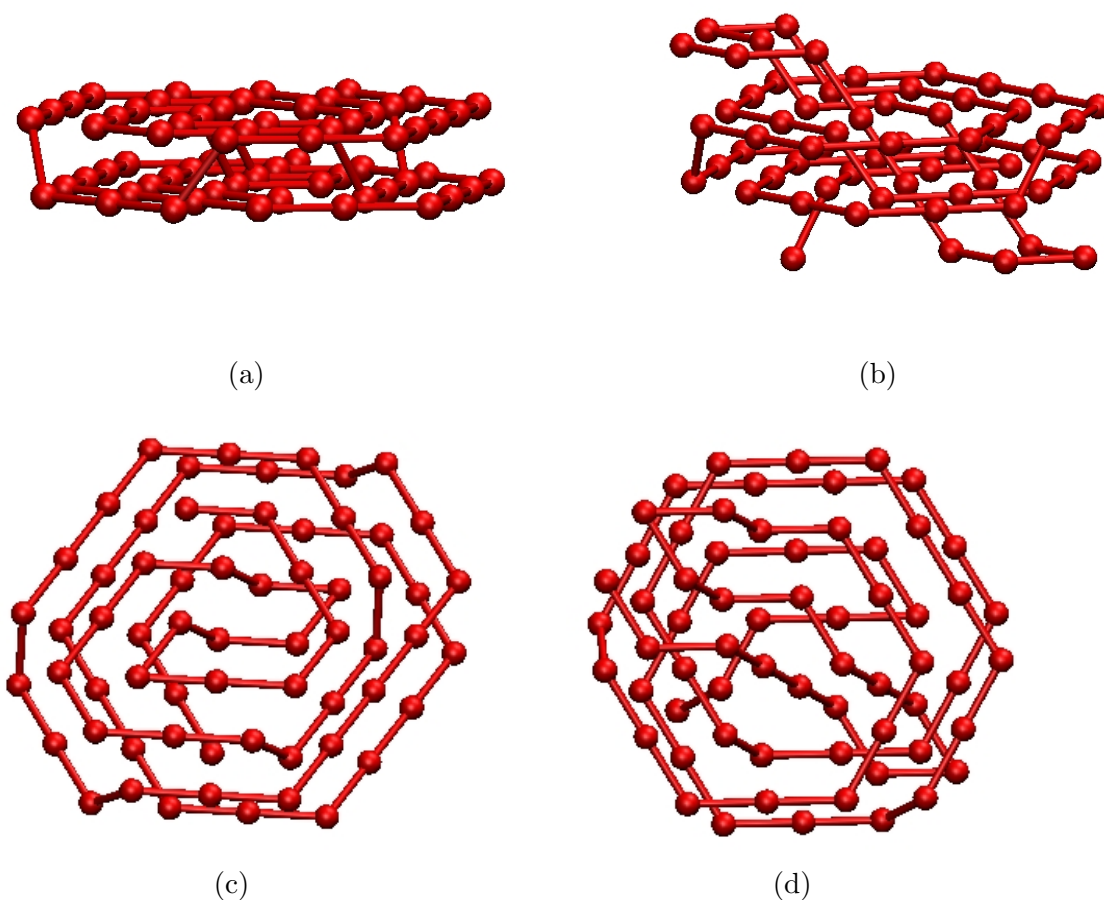

Fig. 2. Part (a) the low-energy conformation of the FCC 64 amino acid homopolymer found by our bin framework (energy  $-387$ , short-range energy is  $-220$ , long-range energy is  $-167$ ); part (b) another low-energy conformation of the FCC 64 amino acid homopolymer found by our bin framework (energy  $-387$ , short-range energy is  $-220$ , long-range energy is  $-167$ ). Part (c) the same conformation as in part (a), view from above; part (d) the same conformation as in part (b), view from above.

of length 32 with target energy  $-161$  while varying *noImprRetrieve* from 1 000 to 2 000 000 steps. As can be seen from the results shown in Figure 3, the value of the *noImprRetrieve* parameter significantly affects performance of BINMC. For the homopolymer of length 32, a value close to 1 000 000 steps gives the best performance. For low values of *noImprRetrieve*, conformations are retrieved too frequently, resulting in a compromised ability of the algorithm to explore promising regions of the search landscape. On the other hand, for very large values of *noImprRetrieve*, BINMC's behaviour approaches that of a pure Monte Carlo search with temperature  $T_{MC}$ .

In informal experiments, we found evidence that the best value for the *noImprRetrieve* parameter increases with chain length; for the homopolymer of 64 amino acids *noImprRetrieve* = 2 000 000 steps results in good performance. This obser-

vation is consistent with the intuition that for longer chains, more time is required to explore promising local optima.

Additionally, we compared BINMC (which performs an adaptive retrieval of diverse conformations) with a simpler restart strategy: If there was no improvement on the best energy observed for  $noImprRetrieve = 1\,000\,000$  steps, instead of retrieving a conformation from one of the bins we restarted the search with a newly constructed conformation. The resulting algorithm failed to reach the target energy of  $-161$  within one week of CPU time on our 2.4 GHz reference machine (the lowest energy level reached was  $-159$ ). Similarly, in the case of the homopolymer of length 64, the lowest energy level reached within one week of CPU time was  $-365$ .

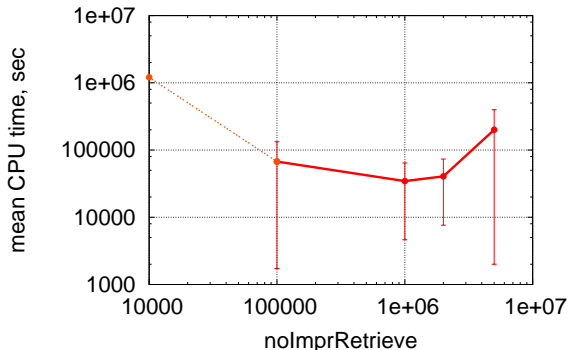

Fig. 3. Mean CPU time required for finding minimum energy conformations ( $-161$ ) of the 32 amino acid homopolymer over 20 independent runs on our reference machine as a function of the number of non-improving steps ( $noImprRetrieve$ ) before retrieving a conformation from bins. The error bars indicate the standard deviation over these runs. The dashed line indicates that energy of  $-161$  was not reached after 2 weeks' CPU time on our reference machine.

## 2.2 The Energy Range $\Delta E$ and the Retrieval Temperature $T_{bin}$

The energy range  $\Delta E$  determines the conformations that may be stored in the bin system, and the temperature  $T_{bin}$  controls the probability of retrieving conformations of various energies. Since it would be inefficient to store conformations that will later have a very low probability of being retrieved, the relative settings of these two parameters are important. The probability of retrieval of the conformation with the highest energy ( $\hat{E} + \Delta E$ ) from the bin system is equal to  $p = e^{-\beta_{bin}\Delta E}$ , where  $\beta_{bin} = 1/(k_B \cdot T_{bin})$ . Thus, for example, if we would like to have at least a 1% chance of retrieving the highest energy conformation from the bin system ( $e^{-\beta_{bin}\Delta E} \geq 0.01$ ), the following

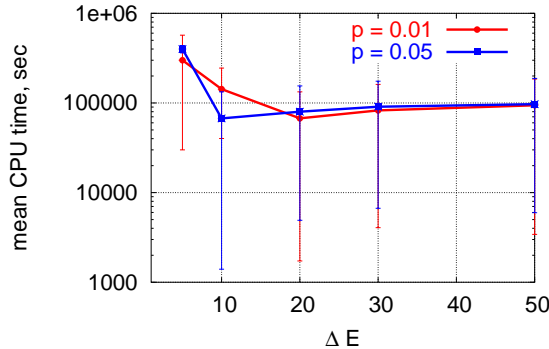

Fig. 4. Mean CPU time required for finding minimum energy conformations ( $-161$ ) of the 32 amino acid homopolymer over 20 independent runs on our reference machine as a function of the energy range  $\Delta E$  and the retrieval temperature  $T_{bin}$  such that  $e^{-\Delta E/T_{bin}} \geq p$ . The error bars indicate the standard deviation over these runs.

condition must hold:  $\frac{\Delta E}{T_{bin}} \geq 4.605$  (note that temperature is measured in units of  $[\varepsilon_0/k_B]$ ). Therefore, if we fix a lower bound  $p$  on the probability of retrieval and one other parameter (either  $\Delta E$  or  $T_{bin}$ , we chose  $\Delta E$ ), we can calculate the value of another parameter ( $T_{bin}$ ). We fixed  $p$  at 0.01 and 0.05 and varied  $\Delta E$  from 10 to 50 $[\varepsilon_0]$ . Our results presented in Figure 4 indicate that BINMC shows a rather robust performance for various combinations of  $\Delta E$  and  $T_{bin}$  settings. The performance deteriorates when the  $\Delta E$  range is too small and also when we are only storing a few of the best conformations encountered. The search time increases slowly as  $\Delta E$  becomes too large and when we are storing too many conformations. Each probability value (we tested  $p = 0.01$  and  $p = 0.05$ ) seems to have its optimal  $\Delta E$  range, and as  $p$  increases, the optimal  $\Delta E$  seems to decrease. This observation is consistent with the intuition that if the retrieval probability is increased, the search can perform well with a smaller energy range of interest, since the binned conformations have a higher chance of being retrieved. From experiments with the longer homopolymer of length 64 (not reported here) larger  $\Delta E$  values result in good performance; particularly  $\Delta E = 30$  and  $T_{bin} = 6.522$ , which implies  $p \geq 0.01$ , works well.

As for the relationship between  $T_{MC}$  and  $T_{bin}$ , here we only investigated the case when MC is run at a low temperature and the bin framework uses a high temperature for conformation retrieval. This scenario seems most promising, given the intuition that the basic search process has to be efficient in minimizing conformational energy, while the bin framework provides diversification and additional intensification at the same time. We found that running MC at high temperatures, for example,  $T_{MC} = 2.0$  for both, the 32 and 64 amino acid polymers, does not result in very good performance. Therefore,  $T_{MC}$  was kept constant at 1.25, which is below the transition temperature of 1.8  $[\varepsilon_0/k_B]$

reported for the homopolymer of length 64, see Gront et al. (2000) and Zhang et al. (2001).

### 2.3 The Hamming Distance Limits $HD_{MAX}$ and $HD_{MIN}$

The efficiency of our bin framework also depends on the diversity of conformations binned at each energy level. In this experiment, we investigated the role played by the Hamming distance criterion, which is controlled by the  $HD_{MAX}$  and  $HD_{MIN}$  parameters, for the overall performance of BINMC. First, we fixed  $HD_{MIN}$  (the fraction of residues that have to be different for low-energy conformations), and varied  $HD_{MAX}$  (the fraction of residues that have to be different for high-energy conformations) from 0.2 to 0.9. Note that setting any Hamming distance threshold to 0 would result in storing many copies of the same conformation. As seen in Figure 5,  $HD_{MAX}$  of about 0.6 seems to result in the best performance. As expected, if  $HD_{MAX}$  is set too low, the diversity of the set stored decreases and this impairs performance. If  $HD_{MAX}$  is set too high, very few conformations may exist to satisfy the corresponding stringent diversity criterion. Next, we fixed  $HD_{MAX}$ , and var-

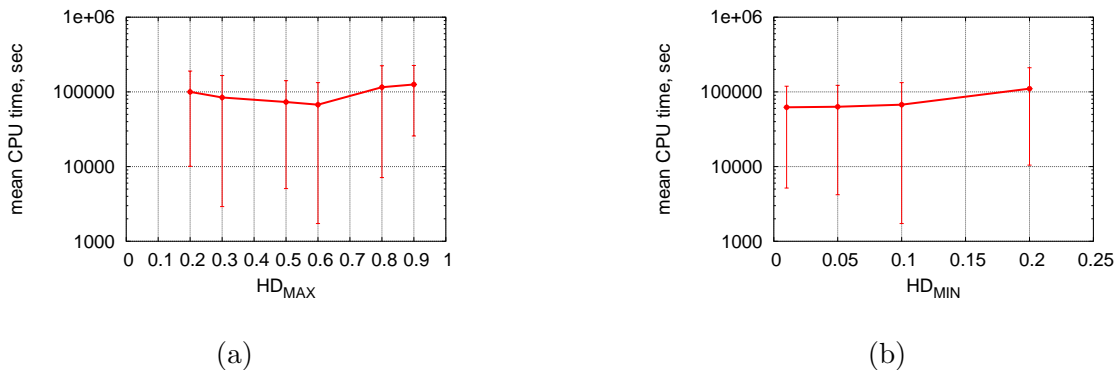

Fig. 5. Mean CPU time required for finding minimum energy conformations ( $-161$ ) of the 32 amino acid homopolymer over 20 independent runs on our reference machine as a function of the Hamming distance limits; part (a):  $HD_{MAX}$  is varied,  $HD_{MIN} = 0.1$  is kept constant; part(b):  $HD_{MIN}$  is varied,  $HD_{MAX} = 0.6$  is kept constant. The error bars indicate the standard deviation over these runs.

ied  $HD_{MIN}$  from 0.01 to 0.9. As seen from Figure 5, if  $HD_{MIN} > 0.1$  is set too high, the binning process becomes less efficient, since not all promising low-energy conformations are binned. This happens because there are fewer conformations at low-energy levels and these are more similar to each other than are higher-energy level conformations.

In informal experiments (not reported here), we found that similar values for

$HD_{MAX}$  and  $HD_{MIN}$  appear to result in good performance for the homopolymer of length 64 (namely,  $0.6 \leq HD_{MAX} \leq 0.8$  and  $HD_{MIN} = 0.01$ ).

#### 2.4 The Energy Window Width $\Delta E_i$

In this experiment, we studied the performance of the BINMC algorithm a function of the energy window width,  $\Delta E_i$ . Intuitively,  $\Delta E_i$  controls the level of coarse-graining during the process of memorizing promising conformations. For simplicity, it is constant for all bins  $i$  in our implementation. Note that jointly,  $\Delta E_i$  and the overall energy range  $\Delta E$  determine the number of bins,  $numBins$ .

As seen in Figure 6, we varied  $\Delta E_i$  from 1 (when every single energy level is stored in its own bin) to  $10\varepsilon_0$  (when 10 different energy levels are combined in each bin). We observed that the performance of BINMC is quite robust with respect to the width of the energy window and that the optimal value appears to be around  $5\varepsilon_0$ . For the homopolymer of length 64, both  $\Delta E_i = 5$  and  $\Delta E_i = 10$  seem to result in good performance.

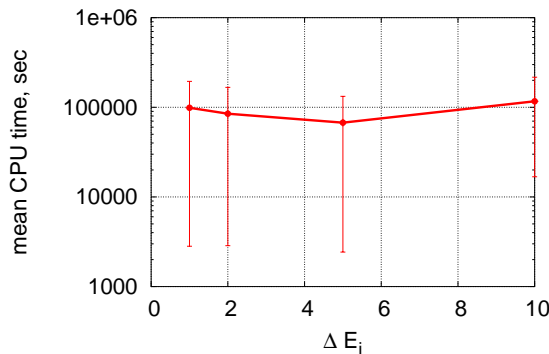

Fig. 6. Mean CPU time required for finding minimum energy conformations ( $-161$ ) of the 32 amino acid homopolymer over 20 independent runs on our reference machine as a function of the energy window width  $\Delta E_i$ . The error bars indicate the standard deviation over these runs.

#### 2.5 The Bin Capacity $cap_i$

In our final experiment, we studied the impact of the bin capacity, which determines the number of conformations stored in each bin. As can be seen in Figure 7, good performance is generally obtained for  $cap_i = 100$ . Storing

too few or too many conformations results in a less efficient search process, because when too few conformations are stored the bin system does not provide effective search diversification, while storing too many conformations incurs unamortized computational overhead. For the homopolymer of length 64, a bin capacity of 100 appears to also work well.

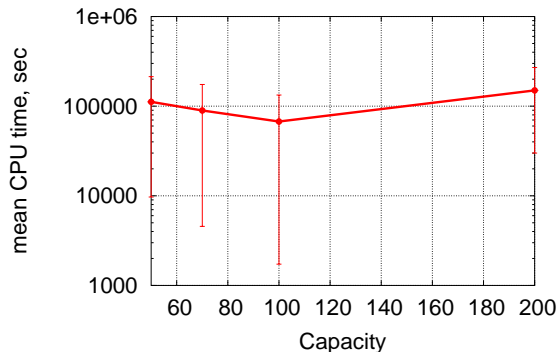

Fig. 7. Mean CPU time required for finding minimum energy conformations ( $-161$ ) of the 32 amino acid homopolymer over 20 independent runs on our reference machine as a function of bin capacity. The error bars indicate the standard deviation over these runs.

### 3 Detailed description of lowest-energy conformations

A lowest energy conformation for the homopolymer of length 64 found by our BINMC is specified in detail in Tables 1-9; Tables 10-13 list an example of the best energy conformation for the homopolymer of length 32. Similarly, examples of the lowest energy conformations for the homopolymers of length 24 and 12 are provided in Tables 14-16, and 17-19, respectively.



| <i>vector</i> [#] | $(x, y, z)$ |
|-------------------|-------------|
| <b>v</b> [0]      | (1, 1, 0)   |
| <b>v</b> [1]      | (0, 1, -1)  |
| <b>v</b> [2]      | (0, 1, -1)  |
| <b>v</b> [3]      | (-1, 0, -1) |
| <b>v</b> [4]      | (-1, -1, 0) |
| <b>v</b> [5]      | (-1, -1, 0) |
| <b>v</b> [6]      | (0, -1, 1)  |
| <b>v</b> [7]      | (0, -1, 1)  |
| <b>v</b> [8]      | (1, 0, 1)   |
| <b>v</b> [9]      | (1, 0, 1)   |
| <b>v</b> [10]     | (1, 1, 0)   |
| <b>v</b> [11]     | (1, 1, 0)   |
| <b>v</b> [12]     | (0, 1, -1)  |
| <b>v</b> [13]     | (0, 1, -1)  |
| <b>v</b> [14]     | (0, 1, -1)  |
| <b>v</b> [15]     | (-1, 0, -1) |
| <b>v</b> [16]     | (-1, 0, -1) |
| <b>v</b> [17]     | (-1, -1, 0) |
| <b>v</b> [18]     | (-1, -1, 0) |
| <b>v</b> [19]     | (-1, -1, 0) |
| <b>v</b> [20]     | (0, -1, 1)  |
| <b>v</b> [21]     | (0, -1, 1)  |
| <b>v</b> [22]     | (0, -1, 1)  |
| <b>v</b> [23]     | (1, 0, 1)   |
| <b>v</b> [24]     | (1, 0, 1)   |
| <b>v</b> [25]     | (0, 1, 1)   |
| <b>v</b> [26]     | (1, 1, 0)   |
| <b>v</b> [27]     | (1, 1, 0)   |
| <b>v</b> [28]     | (0, 1, -1)  |
| <b>v</b> [29]     | (0, 1, -1)  |
| <b>v</b> [30]     | (0, 1, -1)  |
| <b>v</b> [31]     | (-1, 0, -1) |
| <b>v</b> [32]     | (-1, 0, -1) |
| <b>v</b> [33]     | (-1, -1, 0) |
| <b>v</b> [34]     | (-1, -1, 0) |
| <b>v</b> [35]     | (-1, -1, 0) |

Table 1

Vectors for the best found conformation of the 64 amino acid homopolymer (total energy = -391, short-range energy = -212, long-range energy = -179).

| <i>vector</i> [#] | $(x, y, z)$ |
|-------------------|-------------|
| <b>v</b> [36]     | (0, -1, 1)  |
| <b>v</b> [37]     | (0, -1, 1)  |
| <b>v</b> [38]     | (1, 0, 1)   |
| <b>v</b> [39]     | (1, 0, 1)   |
| <b>v</b> [40]     | (1, 1, 0)   |
| <b>v</b> [41]     | (1, 1, 0)   |
| <b>v</b> [42]     | (0, 1, -1)  |
| <b>v</b> [43]     | (0, 1, -1)  |
| <b>v</b> [44]     | (-1, 0, -1) |
| <b>v</b> [45]     | (-1, -1, 0) |
| <b>v</b> [46]     | (-1, -1, 0) |
| <b>v</b> [47]     | (0, -1, 1)  |
| <b>v</b> [48]     | (1, 1, 0)   |
| <b>v</b> [49]     | (1, 1, 0)   |
| <b>v</b> [50]     | (1, 0, -1)  |
| <b>v</b> [51]     | (1, 0, -1)  |
| <b>v</b> [52]     | (1, 1, 0)   |
| <b>v</b> [53]     | (0, -1, 1)  |
| <b>v</b> [54]     | (-1, -1, 0) |
| <b>v</b> [55]     | (-1, 0, 1)  |
| <b>v</b> [56]     | (-1, 0, 1)  |
| <b>v</b> [57]     | (-1, -1, 0) |
| <b>v</b> [58]     | (1, 0, -1)  |
| <b>v</b> [59]     | (0, 1, -1)  |
| <b>v</b> [60]     | (1, 0, -1)  |
| <b>v</b> [61]     | (0, 1, -1)  |
| <b>v</b> [62]     | (1, 1, 0)   |

Table 2

Continued, vectors for the best found conformation of the 64 amino acid homopolymer (total energy = -391, short-range energy = -212, long-range energy = -179).

| <i>triplet</i>           | $\theta_1$ | $\theta_2$ | $\theta_3$ | $\varepsilon_{beta}$ |
|--------------------------|------------|------------|------------|----------------------|
| $v_0, v_1, v_2$          | 120        | 180        | 60         | -4                   |
| $v_1, v_2, v_3$          | 180        | 120        | 60         | -4                   |
| $v_2, v_3, v_4$          | 120        | 120        | 120        | 0                    |
| $v_3, v_4, v_5$          | 120        | 180        | 60         | -4                   |
| $v_4, v_5, v_6$          | 180        | 120        | 60         | -4                   |
| $v_5, v_6, v_7$          | 120        | 180        | 60         | -4                   |
| $v_6, v_7, v_8$          | 180        | 120        | 60         | -4                   |
| $v_7, v_8, v_9$          | 120        | 180        | 60         | -4                   |
| $v_8, v_9, v_{10}$       | 180        | 120        | 60         | -4                   |
| $v_9, v_{10}, v_{11}$    | 120        | 180        | 60         | -4                   |
| $v_{10}, v_{11}, v_{12}$ | 180        | 120        | 60         | -4                   |
| $v_{11}, v_{12}, v_{13}$ | 120        | 180        | 60         | -4                   |
| $v_{12}, v_{13}, v_{14}$ | 180        | 180        | 0          | -4                   |
| $v_{13}, v_{14}, v_{15}$ | 180        | 120        | 60         | -4                   |
| $v_{14}, v_{15}, v_{16}$ | 120        | 180        | 60         | -4                   |
| $v_{15}, v_{16}, v_{17}$ | 180        | 120        | 60         | -4                   |
| $v_{16}, v_{17}, v_{18}$ | 120        | 180        | 60         | -4                   |
| $v_{17}, v_{18}, v_{19}$ | 180        | 180        | 0          | -4                   |
| $v_{18}, v_{19}, v_{20}$ | 180        | 120        | 60         | -4                   |
| $v_{19}, v_{20}, v_{21}$ | 120        | 180        | 60         | -4                   |
| $v_{20}, v_{21}, v_{22}$ | 180        | 180        | 0          | -4                   |
| $v_{21}, v_{22}, v_{23}$ | 180        | 120        | 60         | -4                   |
| $v_{22}, v_{23}, v_{24}$ | 120        | 180        | 60         | -4                   |
| $v_{23}, v_{24}, v_{25}$ | 180        | 120        | 60         | -4                   |
| $v_{24}, v_{25}, v_{26}$ | 120        | 120        | 60         | -4                   |
| $v_{25}, v_{26}, v_{27}$ | 120        | 180        | 60         | -4                   |
| $v_{26}, v_{27}, v_{28}$ | 180        | 120        | 60         | -4                   |
| $v_{27}, v_{28}, v_{29}$ | 120        | 180        | 60         | -4                   |
| $v_{28}, v_{29}, v_{30}$ | 180        | 180        | 0          | -4                   |
| $v_{29}, v_{30}, v_{31}$ | 180        | 120        | 60         | -4                   |
| $v_{30}, v_{31}, v_{32}$ | 120        | 180        | 60         | -4                   |
| $v_{31}, v_{32}, v_{33}$ | 180        | 120        | 60         | -4                   |
| $v_{32}, v_{33}, v_{34}$ | 120        | 180        | 60         | -4                   |
| $v_{33}, v_{34}, v_{35}$ | 180        | 180        | 0          | -4                   |
| $v_{34}, v_{35}, v_{36}$ | 180        | 120        | 60         | -4                   |
| $v_{35}, v_{36}, v_{37}$ | 120        | 180        | 60         | -4                   |
| $v_{36}, v_{37}, v_{38}$ | 180        | 120        | 60         | -4                   |
| $v_{37}, v_{38}, v_{39}$ | 120        | 180        | 60         | -4                   |
| $v_{38}, v_{39}, v_{40}$ | 180        | 120        | 60         | -4                   |
| $v_{39}, v_{40}, v_{41}$ | 120        | 180        | 60         | -4                   |
| $v_{40}, v_{41}, v_{42}$ | 180        | 120        | 60         | -4                   |

Table 3

Triplets of vectors, angles:  $\theta_1$  (between vectors  $\mathbf{v}_{i-1}$  and  $\mathbf{v}_i$ ),  $\theta_2$  (between vectors  $\mathbf{v}_i$  and  $\mathbf{v}_{i+1}$ ),  $\theta_3$  (between vectors  $\mathbf{v}_{i-1}$  and  $\mathbf{v}_{i+1}$ ), short-range energy contributions for the best found conformation of the 64 amino acid homopolymer (total energy = -391, short-range energy = -212, long-range energy = -179).

| <i>triplet</i>           | $\theta_1$ | $\theta_2$ | $\theta_3$ | $\varepsilon_{beta}$ |
|--------------------------|------------|------------|------------|----------------------|
| $v_{41}, v_{42}, v_{43}$ | 120        | 180        | 60         | -4                   |
| $v_{42}, v_{43}, v_{44}$ | 180        | 120        | 60         | -4                   |
| $v_{43}, v_{44}, v_{45}$ | 120        | 120        | 120        | 0                    |
| $v_{44}, v_{45}, v_{46}$ | 120        | 180        | 60         | -4                   |
| $v_{45}, v_{46}, v_{47}$ | 180        | 120        | 60         | -4                   |
| $v_{46}, v_{47}, v_{48}$ | 120        | 60         | 180        | 0                    |
| $v_{47}, v_{48}, v_{49}$ | 60         | 180        | 120        | 0                    |
| $v_{48}, v_{49}, v_{50}$ | 180        | 120        | 60         | -4                   |
| $v_{49}, v_{50}, v_{51}$ | 120        | 180        | 60         | -4                   |
| $v_{50}, v_{51}, v_{52}$ | 180        | 120        | 60         | -4                   |
| $v_{51}, v_{52}, v_{53}$ | 120        | 60         | 120        | 0                    |
| $v_{52}, v_{53}, v_{54}$ | 60         | 120        | 180        | 0                    |
| $v_{53}, v_{54}, v_{55}$ | 120        | 120        | 60         | -4                   |
| $v_{54}, v_{55}, v_{56}$ | 120        | 180        | 60         | -4                   |
| $v_{55}, v_{56}, v_{57}$ | 180        | 120        | 60         | -4                   |
| $v_{56}, v_{57}, v_{58}$ | 120        | 60         | 180        | 0                    |
| $v_{57}, v_{58}, v_{59}$ | 60         | 120        | 120        | 0                    |
| $v_{58}, v_{59}, v_{60}$ | 120        | 120        | 0          | -4                   |
| $v_{59}, v_{60}, v_{61}$ | 120        | 120        | 0          | -4                   |
| $v_{60}, v_{61}, v_{62}$ | 120        | 120        | 60         | -4                   |

Table 4

Continued, triplets of vectors, angles:  $\theta_1$  (between vectors  $\mathbf{v}_{i-1}$  and  $\mathbf{v}_i$ ),  $\theta_2$  (between vectors  $\mathbf{v}_i$  and  $\mathbf{v}_{i+1}$ ),  $\theta_3$  (between vectors  $\mathbf{v}_{i-1}$  and  $\mathbf{v}_{i+1}$ ), short-range energy contributions for the best found conformation of the 64 amino acid homopolymer (total energy = -391, short-range energy = -212, long-range energy = -179).

| #  | Long-range interactions |
|----|-------------------------|
| 1  | 10 interacts with 1     |
| 2  | 11 interacts with 1     |
| 3  | 12 interacts with 1     |
| 4  | 12 interacts with 2     |
| 5  | 13 interacts with 2     |
| 6  | 14 interacts with 2     |
| 7  | 14 interacts with 3     |
| 8  | 15 interacts with 3     |
| 9  | 15 interacts with 4     |
| 10 | 16 interacts with 4     |
| 11 | 17 interacts with 5     |
| 12 | 17 interacts with 4     |
| 13 | 18 interacts with 5     |
| 14 | 19 interacts with 6     |
| 15 | 19 interacts with 5     |
| 16 | 20 interacts with 7     |
| 17 | 20 interacts with 6     |
| 18 | 21 interacts with 7     |
| 19 | 22 interacts with 8     |
| 20 | 22 interacts with 7     |
| 21 | 23 interacts with 9     |
| 22 | 23 interacts with 8     |
| 23 | 24 interacts with 9     |
| 24 | 25 interacts with 9     |
| 25 | 25 interacts with 10    |
| 26 | 26 interacts with 10    |
| 27 | 26 interacts with 11    |
| 28 | 27 interacts with 11    |
| 29 | 28 interacts with 11    |
| 30 | 28 interacts with 12    |
| 31 | 29 interacts with 12    |
| 32 | 29 interacts with 13    |
| 33 | 30 interacts with 2     |
| 34 | 30 interacts with 13    |
| 35 | 30 interacts with 14    |
| 36 | 31 interacts with 3     |
| 37 | 31 interacts with 14    |
| 38 | 31 interacts with 15    |
| 39 | 32 interacts with 4     |
| 40 | 32 interacts with 15    |

Table 5

Long-range interactions for the best found conformation of the 64 amino acid homopolymer (total energy =  $-391$ , short-range energy =  $-212$ , long-range energy =  $-179$ ).

| #  | Long-range interactions |
|----|-------------------------|
| 41 | 32 interacts with 16    |
| 42 | 33 interacts with 5     |
| 43 | 33 interacts with 4     |
| 44 | 33 interacts with 17    |
| 45 | 34 interacts with 19    |
| 46 | 34 interacts with 5     |
| 47 | 34 interacts with 18    |
| 48 | 35 interacts with 20    |
| 49 | 35 interacts with 6     |
| 50 | 35 interacts with 19    |
| 51 | 36 interacts with 21    |
| 52 | 36 interacts with 7     |
| 53 | 36 interacts with 20    |
| 54 | 37 interacts with 22    |
| 55 | 37 interacts with 21    |
| 56 | 38 interacts with 23    |
| 57 | 38 interacts with 22    |
| 58 | 39 interacts with 24    |
| 59 | 39 interacts with 23    |
| 60 | 40 interacts with 24    |
| 61 | 40 interacts with 25    |
| 62 | 40 interacts with 9     |
| 63 | 41 interacts with 25    |
| 64 | 41 interacts with 26    |
| 65 | 41 interacts with 10    |
| 66 | 41 interacts with 27    |
| 67 | 42 interacts with 10    |
| 68 | 42 interacts with 27    |
| 69 | 42 interacts with 11    |
| 70 | 42 interacts with 1     |
| 71 | 42 interacts with 28    |
| 72 | 43 interacts with 1     |
| 73 | 43 interacts with 28    |
| 74 | 43 interacts with 12    |
| 75 | 43 interacts with 2     |
| 76 | 43 interacts with 29    |
| 77 | 43 interacts with 30    |
| 78 | 44 interacts with 2     |
| 79 | 44 interacts with 3     |
| 80 | 44 interacts with 30    |
| 81 | 44 interacts with 31    |
| 82 | 45 interacts with 3     |

Table 6

Continued, long-range interactions for the best found conformation of the 64 amino acid homopolymer (total energy =  $-391$ , short-range energy =  $-212$ , long-range energy =  $-179$ ).

| #   | Long-range interactions |
|-----|-------------------------|
| 83  | 45 interacts with 33    |
| 84  | 45 interacts with 4     |
| 85  | 45 interacts with 31    |
| 86  | 45 interacts with 32    |
| 87  | 46 interacts with 35    |
| 88  | 46 interacts with 6     |
| 89  | 46 interacts with 34    |
| 90  | 46 interacts with 5     |
| 91  | 46 interacts with 33    |
| 92  | 47 interacts with 36    |
| 93  | 47 interacts with 7     |
| 94  | 47 interacts with 35    |
| 95  | 47 interacts with 6     |
| 96  | 48 interacts with 38    |
| 97  | 48 interacts with 37    |
| 98  | 48 interacts with 22    |
| 99  | 48 interacts with 8     |
| 100 | 48 interacts with 36    |
| 101 | 48 interacts with 7     |
| 102 | 49 interacts with 39    |
| 103 | 49 interacts with 38    |
| 104 | 49 interacts with 23    |
| 105 | 49 interacts with 40    |
| 106 | 49 interacts with 9     |
| 107 | 49 interacts with 8     |
| 108 | 50 interacts with 48    |
| 109 | 50 interacts with 8     |
| 110 | 50 interacts with 47    |
| 111 | 51 interacts with 47    |
| 112 | 51 interacts with 46    |
| 113 | 51 interacts with 44    |
| 114 | 51 interacts with 45    |
| 115 | 52 interacts with 6     |
| 116 | 52 interacts with 46    |
| 117 | 52 interacts with 5     |
| 118 | 52 interacts with 45    |
| 119 | 52 interacts with 3     |
| 120 | 52 interacts with 4     |
| 121 | 53 interacts with 5     |
| 122 | 53 interacts with 4     |

Table 7

Continued, long-range interactions for the best found conformation of the 64 amino acid homopolymer (total energy =  $-391$ , short-range energy =  $-212$ , long-range energy =  $-179$ ).

| #   | Long-range interactions |
|-----|-------------------------|
| 123 | 54 interacts with 4     |
| 124 | 54 interacts with 17    |
| 125 | 54 interacts with 16    |
| 126 | 55 interacts with 53    |
| 127 | 55 interacts with 3     |
| 128 | 55 interacts with 4     |
| 129 | 55 interacts with 15    |
| 130 | 56 interacts with 52    |
| 131 | 56 interacts with 53    |
| 132 | 56 interacts with 3     |
| 133 | 57 interacts with 1     |
| 134 | 57 interacts with 51    |
| 135 | 57 interacts with 52    |
| 136 | 57 interacts with 44    |
| 137 | 57 interacts with 2     |
| 138 | 57 interacts with 3     |
| 139 | 58 interacts with 50    |
| 140 | 58 interacts with 42    |
| 141 | 58 interacts with 1     |
| 142 | 58 interacts with 51    |
| 143 | 58 interacts with 43    |
| 144 | 58 interacts with 44    |
| 145 | 59 interacts with 40    |
| 146 | 59 interacts with 49    |
| 147 | 59 interacts with 9     |
| 148 | 59 interacts with 41    |
| 149 | 59 interacts with 10    |
| 150 | 59 interacts with 50    |
| 151 | 59 interacts with 42    |
| 152 | 60 interacts with 9     |
| 153 | 60 interacts with 8     |
| 154 | 60 interacts with 10    |
| 155 | 60 interacts with 50    |
| 156 | 60 interacts with 58    |
| 157 | 60 interacts with 1     |
| 158 | 60 interacts with 57    |
| 159 | 61 interacts with 8     |
| 160 | 61 interacts with 7     |
| 161 | 61 interacts with 50    |
| 162 | 61 interacts with 47    |
| 163 | 61 interacts with 6     |
| 164 | 61 interacts with 51    |
| 165 | 61 interacts with 57    |

Table 8

Continued, long-range interactions for the best found conformation of the 64 amino acid homopolymer (total energy =  $-391$ , short-range energy =  $-212$ , long-range energy =  $-179$ ).



| #   | Long-range interactions |
|-----|-------------------------|
| 166 | 61 interacts with 52    |
| 167 | 62 interacts with 6     |
| 168 | 62 interacts with 52    |
| 169 | 62 interacts with 56    |
| 170 | 62 interacts with 53    |
| 171 | 63 interacts with 6     |
| 172 | 63 interacts with 19    |
| 173 | 63 interacts with 5     |
| 174 | 63 interacts with 53    |
| 175 | 64 interacts with 5     |
| 176 | 64 interacts with 53    |
| 177 | 64 interacts with 18    |
| 178 | 64 interacts with 17    |
| 179 | 64 interacts with 54    |

Table 9

Continued, long-range interactions for the best found conformation of the 64 amino acid homopolymer (total energy =  $-391$ , short-range energy =  $-212$ , long-range energy =  $-179$ ).

| <i>vector</i> [#] | $(x, y, z)$ |
|-------------------|-------------|
| $\mathbf{v}[0]$   | (1, 0, -1)  |
| $\mathbf{v}[1]$   | (1, -1, 0)  |
| $\mathbf{v}[2]$   | (1, -1, 0)  |
| $\mathbf{v}[3]$   | (0, -1, 1)  |
| $\mathbf{v}[4]$   | (-1, 0, 1)  |
| $\mathbf{v}[5]$   | (-1, 0, 1)  |
| $\mathbf{v}[6]$   | (-1, 1, 0)  |
| $\mathbf{v}[7]$   | (-1, 1, 0)  |
| $\mathbf{v}[8]$   | (0, 1, -1)  |
| $\mathbf{v}[9]$   | (0, 1, -1)  |
| $\mathbf{v}[10]$  | (1, 0, -1)  |
| $\mathbf{v}[11]$  | (1, 0, -1)  |
| $\mathbf{v}[12]$  | (1, -1, 0)  |
| $\mathbf{v}[13]$  | (1, -1, 0)  |
| $\mathbf{v}[14]$  | (1, -1, 0)  |
| $\mathbf{v}[15]$  | (0, -1, 1)  |
| $\mathbf{v}[16]$  | (0, -1, 1)  |
| $\mathbf{v}[17]$  | (-1, 0, 1)  |
| $\mathbf{v}[18]$  | (-1, 0, 1)  |
| $\mathbf{v}[19]$  | (0, 1, 1)   |
| $\mathbf{v}[20]$  | (-1, 1, 0)  |
| $\mathbf{v}[21]$  | (-1, 1, 0)  |
| $\mathbf{v}[22]$  | (0, 1, -1)  |
| $\mathbf{v}[23]$  | (0, 1, -1)  |
| $\mathbf{v}[24]$  | (1, 0, -1)  |
| $\mathbf{v}[25]$  | (1, 0, -1)  |
| $\mathbf{v}[26]$  | (1, -1, 0)  |
| $\mathbf{v}[27]$  | (1, -1, 0)  |
| $\mathbf{v}[28]$  | (0, -1, 1)  |
| $\mathbf{v}[29]$  | (0, -1, 1)  |
| $\mathbf{v}[30]$  | (-1, 0, 1)  |

Table 10

Vectors for the best found conformation of the 32 amino acid homopolymer (total energy = -161, short-range energy = -112, long-range energy = -49).

| <i>triplet</i>           | $\theta_1$ | $\theta_2$ | $\theta_3$ | $\varepsilon_{beta}$ |
|--------------------------|------------|------------|------------|----------------------|
| $v_0, v_1, v_2$          | 120        | 180        | 60         | -4                   |
| $v_1, v_2, v_3$          | 180        | 120        | 60         | -4                   |
| $v_2, v_3, v_4$          | 120        | 120        | 120        | 0                    |
| $v_3, v_4, v_5$          | 120        | 180        | 60         | -4                   |
| $v_4, v_5, v_6$          | 180        | 120        | 60         | -4                   |
| $v_5, v_6, v_7$          | 120        | 180        | 60         | -4                   |
| $v_6, v_7, v_8$          | 180        | 120        | 60         | -4                   |
| $v_7, v_8, v_9$          | 120        | 180        | 60         | -4                   |
| $v_8, v_9, v_{10}$       | 180        | 120        | 60         | -4                   |
| $v_9, v_{10}, v_{11}$    | 120        | 180        | 60         | -4                   |
| $v_{10}, v_{11}, v_{12}$ | 180        | 120        | 60         | -4                   |
| $v_{11}, v_{12}, v_{13}$ | 120        | 180        | 60         | -4                   |
| $v_{12}, v_{13}, v_{14}$ | 180        | 180        | 0          | -4                   |
| $v_{13}, v_{14}, v_{15}$ | 180        | 120        | 60         | -4                   |
| $v_{14}, v_{15}, v_{16}$ | 120        | 180        | 60         | -4                   |
| $v_{15}, v_{16}, v_{17}$ | 180        | 120        | 60         | -4                   |
| $v_{16}, v_{17}, v_{18}$ | 120        | 180        | 60         | -4                   |
| $v_{17}, v_{18}, v_{19}$ | 180        | 120        | 60         | -4                   |
| $v_{18}, v_{19}, v_{20}$ | 120        | 120        | 60         | -4                   |
| $v_{19}, v_{20}, v_{21}$ | 120        | 180        | 60         | -4                   |
| $v_{20}, v_{21}, v_{22}$ | 180        | 120        | 60         | -4                   |
| $v_{21}, v_{22}, v_{23}$ | 120        | 180        | 60         | -4                   |
| $v_{22}, v_{23}, v_{24}$ | 180        | 120        | 60         | -4                   |
| $v_{23}, v_{24}, v_{25}$ | 120        | 180        | 60         | -4                   |
| $v_{24}, v_{25}, v_{26}$ | 180        | 120        | 60         | -4                   |
| $v_{25}, v_{26}, v_{27}$ | 120        | 180        | 60         | -4                   |
| $v_{26}, v_{27}, v_{28}$ | 180        | 120        | 60         | -4                   |
| $v_{27}, v_{28}, v_{29}$ | 120        | 180        | 60         | -4                   |
| $v_{28}, v_{29}, v_{30}$ | 180        | 120        | 60         | -4                   |

Table 11

Triples of vectors, angles:  $\theta_1$  (between vectors  $\mathbf{v}_{i-1}$  and  $\mathbf{v}_i$ ),  $\theta_2$  (between vectors  $\mathbf{v}_i$  and  $\mathbf{v}_{i+1}$ ),  $\theta_3$  (between vectors  $\mathbf{v}_{i-1}$  and  $\mathbf{v}_{i+1}$ ), short-range energy contributions for the best found conformation of the 32 amino acid homopolymer (total energy = -161, short-range energy = -112, long-range energy = -49).

| #  | Long-range interactions |
|----|-------------------------|
| 1  | 10 interacts with 1     |
| 2  | 11 interacts with 1     |
| 3  | 12 interacts with 1     |
| 4  | 12 interacts with 2     |
| 5  | 13 interacts with 2     |
| 6  | 14 interacts with 2     |
| 7  | 14 interacts with 3     |
| 8  | 15 interacts with 3     |
| 9  | 15 interacts with 4     |
| 10 | 16 interacts with 4     |
| 11 | 17 interacts with 5     |
| 12 | 17 interacts with 4     |
| 13 | 18 interacts with 5     |
| 14 | 19 interacts with 6     |
| 15 | 19 interacts with 5     |
| 16 | 20 interacts with 7     |
| 17 | 20 interacts with 6     |
| 18 | 21 interacts with 7     |
| 19 | 22 interacts with 8     |
| 20 | 22 interacts with 7     |
| 21 | 23 interacts with 9     |
| 22 | 23 interacts with 8     |
| 23 | 24 interacts with 9     |
| 24 | 24 interacts with 10    |
| 25 | 25 interacts with 10    |
| 26 | 25 interacts with 11    |
| 27 | 25 interacts with 1     |
| 28 | 26 interacts with 1     |
| 29 | 26 interacts with 12    |
| 30 | 26 interacts with 2     |
| 31 | 27 interacts with 2     |
| 32 | 27 interacts with 13    |
| 33 | 27 interacts with 14    |
| 34 | 28 interacts with 3     |
| 35 | 28 interacts with 14    |
| 36 | 28 interacts with 15    |
| 37 | 29 interacts with 4     |
| 38 | 29 interacts with 15    |
| 39 | 29 interacts with 16    |
| 40 | 30 interacts with 5     |

Table 12

Long-range interactions for the best found conformation of the 32 amino acid homopolymer (total energy =  $-161$ , short-range energy =  $-112$ , long-range energy =  $-49$ ).

| #  | Long-range interactions |
|----|-------------------------|
| 41 | 30 interacts with 4     |
| 42 | 30 interacts with 17    |
| 43 | 31 interacts with 19    |
| 44 | 31 interacts with 5     |
| 45 | 31 interacts with 18    |
| 46 | 32 interacts with 20    |
| 47 | 32 interacts with 6     |
| 48 | 32 interacts with 19    |
| 49 | 32 interacts with 21    |

Table 13

Continued, long-range interactions for the best found conformation of the 32 amino acid homopolymer (total energy =  $-161$ , short-range energy =  $-112$ , long-range energy =  $-49$ ).

| <i>vector</i> [#] | $(x, y, z)$ |
|-------------------|-------------|
| <b>v</b> [0]      | (1, 0, -1)  |
| <b>v</b> [1]      | (0, -1, -1) |
| <b>v</b> [2]      | (0, -1, -1) |
| <b>v</b> [3]      | (1, -1, 0)  |
| <b>v</b> [4]      | (0, -1, -1) |
| <b>v</b> [5]      | (0, -1, -1) |
| <b>v</b> [6]      | (-1, -1, 0) |
| <b>v</b> [7]      | (-1, 0, -1) |
| <b>v</b> [8]      | (0, 1, 1)   |
| <b>v</b> [9]      | (1, 0, 1)   |
| <b>v</b> [10]     | (0, 1, 1)   |
| <b>v</b> [11]     | (0, 1, 1)   |
| <b>v</b> [12]     | (0, 1, 1)   |
| <b>v</b> [13]     | (1, 1, 0)   |
| <b>v</b> [14]     | (0, 1, 1)   |
| <b>v</b> [15]     | (-1, -1, 0) |
| <b>v</b> [16]     | (-1, 0, -1) |
| <b>v</b> [17]     | (0, -1, -1) |
| <b>v</b> [18]     | (0, -1, -1) |
| <b>v</b> [19]     | (1, 0, -1)  |
| <b>v</b> [20]     | (0, -1, -1) |
| <b>v</b> [21]     | (0, -1, -1) |
| <b>v</b> [22]     | (1, -1, 0)  |

Table 14

Vectors for the best found conformation of the 24 amino acid homopolymer (total energy = -109, short-range energy = -68, long-range energy = -41).

| <i>triplet</i>           | $\theta_1$ | $\theta_2$ | $\theta_3$ | $\varepsilon_{beta}$ |
|--------------------------|------------|------------|------------|----------------------|
| $v_0, v_1, v_2$          | 120        | 180        | 60         | -4                   |
| $v_1, v_2, v_3$          | 180        | 120        | 60         | -4                   |
| $v_2, v_3, v_4$          | 120        | 120        | 0          | -4                   |
| $v_3, v_4, v_5$          | 120        | 180        | 60         | -4                   |
| $v_4, v_5, v_6$          | 180        | 120        | 60         | -4                   |
| $v_5, v_6, v_7$          | 120        | 120        | 60         | -4                   |
| $v_6, v_7, v_8$          | 120        | 60         | 120        | 0                    |
| $v_7, v_8, v_9$          | 60         | 120        | 180        | 0                    |
| $v_8, v_9, v_{10}$       | 120        | 120        | 0          | -4                   |
| $v_9, v_{10}, v_{11}$    | 120        | 180        | 60         | -4                   |
| $v_{10}, v_{11}, v_{12}$ | 180        | 180        | 0          | -4                   |
| $v_{11}, v_{12}, v_{13}$ | 180        | 120        | 60         | -4                   |
| $v_{12}, v_{13}, v_{14}$ | 120        | 120        | 0          | -4                   |
| $v_{13}, v_{14}, v_{15}$ | 120        | 60         | 180        | 0                    |
| $v_{14}, v_{15}, v_{16}$ | 60         | 120        | 120        | 0                    |
| $v_{15}, v_{16}, v_{17}$ | 120        | 120        | 60         | -4                   |
| $v_{16}, v_{17}, v_{18}$ | 120        | 180        | 60         | -4                   |
| $v_{17}, v_{18}, v_{19}$ | 180        | 120        | 60         | -4                   |
| $v_{18}, v_{19}, v_{20}$ | 120        | 120        | 0          | -4                   |
| $v_{19}, v_{20}, v_{21}$ | 120        | 180        | 60         | -4                   |
| $v_{20}, v_{21}, v_{22}$ | 180        | 120        | 60         | -4                   |

Table 15

Triplets of vectors, angles:  $\theta_1$  (between vectors  $\mathbf{v}_{i-1}$  and  $\mathbf{v}_i$ ),  $\theta_2$  (between vectors  $\mathbf{v}_i$  and  $\mathbf{v}_{i+1}$ ),  $\theta_3$  (between vectors  $\mathbf{v}_{i-1}$  and  $\mathbf{v}_{i+1}$ ), short-range energy contributions for the best found conformation of the 24 amino acid homopolymer (total energy = -109, short-range energy = -68, long-range energy = -41).

| #  | Long-range interactions |
|----|-------------------------|
| 1  | 10 interacts with 8     |
| 2  | 11 interacts with 8     |
| 3  | 11 interacts with 7     |
| 4  | 11 interacts with 6     |
| 5  | 12 interacts with 6     |
| 6  | 12 interacts with 5     |
| 7  | 13 interacts with 4     |
| 8  | 13 interacts with 5     |
| 9  | 14 interacts with 3     |
| 10 | 15 interacts with 3     |
| 11 | 15 interacts with 2     |
| 12 | 16 interacts with 2     |
| 13 | 17 interacts with 14    |
| 14 | 17 interacts with 1     |
| 15 | 17 interacts with 2     |
| 16 | 17 interacts with 15    |
| 17 | 18 interacts with 14    |
| 18 | 18 interacts with 3     |
| 19 | 18 interacts with 1     |
| 20 | 18 interacts with 2     |
| 21 | 19 interacts with 13    |
| 22 | 19 interacts with 4     |
| 23 | 19 interacts with 14    |
| 24 | 19 interacts with 3     |
| 25 | 20 interacts with 12    |
| 26 | 20 interacts with 13    |
| 27 | 20 interacts with 4     |
| 28 | 21 interacts with 12    |
| 29 | 21 interacts with 6     |
| 30 | 21 interacts with 4     |
| 31 | 21 interacts with 5     |
| 32 | 22 interacts with 10    |
| 33 | 22 interacts with 11    |
| 34 | 22 interacts with 7     |
| 35 | 22 interacts with 6     |
| 36 | 23 interacts with 9     |
| 37 | 23 interacts with 10    |
| 38 | 23 interacts with 8     |
| 39 | 23 interacts with 7     |
| 40 | 24 interacts with 8     |
| 41 | 24 interacts with 7     |

Table 16

Long-range interactions for the best found conformation of the 24 amino acid homopolymer (total energy =  $-109$ , short-range energy =  $-68$ , long-range energy =  $-41$ ).



| <i>vector</i> [#] | $(x, y, z)$   |
|-------------------|---------------|
| $\mathbf{v}[0]$   | $(-1, -1, 0)$ |
| $\mathbf{v}[1]$   | $(0, -1, 1)$  |
| $\mathbf{v}[2]$   | $(0, -1, 1)$  |
| $\mathbf{v}[3]$   | $(1, -1, 0)$  |
| $\mathbf{v}[4]$   | $(1, -1, 0)$  |
| $\mathbf{v}[5]$   | $(1, 0, -1)$  |
| $\mathbf{v}[6]$   | $(-1, 1, 0)$  |
| $\mathbf{v}[7]$   | $(-1, 1, 0)$  |
| $\mathbf{v}[8]$   | $(0, 1, -1)$  |
| $\mathbf{v}[9]$   | $(0, 1, -1)$  |
| $\mathbf{v}[10]$  | $(-1, 1, 0)$  |

Table 17

Vectors for the best found conformation of the 12 amino acid homopolymer (total energy =  $-39$ , short-range energy =  $-28$ , long-range energy =  $-11$ ).

| <i>triplet</i>     | $\theta_1$ | $\theta_2$ | $\theta_3$ | $\varepsilon_{beta}$ |
|--------------------|------------|------------|------------|----------------------|
| $v_0, v_1, v_2$    | 120        | 180        | 60         | -4                   |
| $v_1, v_2, v_3$    | 180        | 120        | 60         | -4                   |
| $v_2, v_3, v_4$    | 120        | 180        | 60         | -4                   |
| $v_3, v_4, v_5$    | 180        | 120        | 60         | -4                   |
| $v_4, v_5, v_6$    | 120        | 60         | 180        | 0                    |
| $v_5, v_6, v_7$    | 60         | 180        | 120        | 0                    |
| $v_6, v_7, v_8$    | 180        | 120        | 60         | -4                   |
| $v_7, v_8, v_9$    | 120        | 180        | 60         | -4                   |
| $v_8, v_9, v_{10}$ | 180        | 120        | 60         | -4                   |

Table 18

Triples of vectors, angles:  $\theta_1$  (between vectors  $\mathbf{v}_{i-1}$  and  $\mathbf{v}_i$ ),  $\theta_2$  (between vectors  $\mathbf{v}_i$  and  $\mathbf{v}_{i+1}$ ),  $\theta_3$  (between vectors  $\mathbf{v}_{i-1}$  and  $\mathbf{v}_{i+1}$ ), short-range energy contributions for the best found conformation of the 12 amino acid homopolymer (total energy =  $-39$ , short-range energy =  $-28$ , long-range energy =  $-11$ ).

| #  | Long-range interactions |
|----|-------------------------|
| 1  | 8 interacts with 5      |
| 2  | 8 interacts with 6      |
| 3  | 9 interacts with 4      |
| 4  | 9 interacts with 5      |
| 5  | 9 interacts with 3      |
| 6  | 10 interacts with 3     |
| 7  | 10 interacts with 2     |
| 8  | 11 interacts with 2     |
| 9  | 11 interacts with 1     |
| 10 | 12 interacts with 2     |
| 11 | 12 interacts with 1     |

Table 19

Long-range interactions for the best found conformation of the 12 amino acid homopolymer (total energy =  $-39$ , short-range energy =  $-28$ , long-range energy =  $-11$ ).
